# Supplementary material
Source: HighWire-hosted journal article supplement (https://bmjopen.bmj.com/content/11/9/e050521)
Supplement: inline-supplementary-material-1 [file inline-supplementary-material-1.pdf]

## Assessment of time-related deficits in older adults: A scoping review protocol

### Supplementary material. Example of search strategy for PubMed

```
((("SCREENING"[Title/Abstract] OR "ASSESSMENT"[Title/Abstract] OR "assess*"[All Fields] OR "TOOL"[Title/Abstract] OR "SCALE"[Title/Abstract] OR "INSTRUMENT"[Title/Abstract] OR "MONITOR"[Title/Abstract] OR "EVALUATE"[Title/Abstract] OR "IDENTIFY"[Title/Abstract] OR "TEST"[Title/Abstract]) AND ("TIME RELATED"[Title/Abstract] OR "TIME ORIENTATION"[Title/Abstract] OR "ROUTINE ACTIVITIES"[Title/Abstract] OR "COGNITIVE DEFICIT"[Title/Abstract]) AND ("humans"[MeSH Terms] AND 2000/01/01:2020/09/20[Date - Publication] AND ("middle aged"[MeSH Terms] OR "aged"[MeSH Terms]))) AND ((humans[Filter]) AND (2000/1/1:2020/9/20[pdat]) AND (middleaged[Filter] OR aged[Filter]))
```
